# Supplementary material for: Analysis of AKT and ERK1/2 protein kinases in extracellular vesicles isolated from blood of patients with cancer
Source: PubMed Central journal article supplement — J Extracell Vesicles. 2014 Dec 8;3:10.3402/jev.v3.25657. doi: 10.3402/jev.v3.25657 (PMC4261239; doi:10.3402/jev.v3.25657), 2014-12-08
Supplement: JEV-3-25657-s001.pdf [file JEV-3-25657-s001.pdf]

**Supplementary figure 1.** Coomassie staining of the MS samples

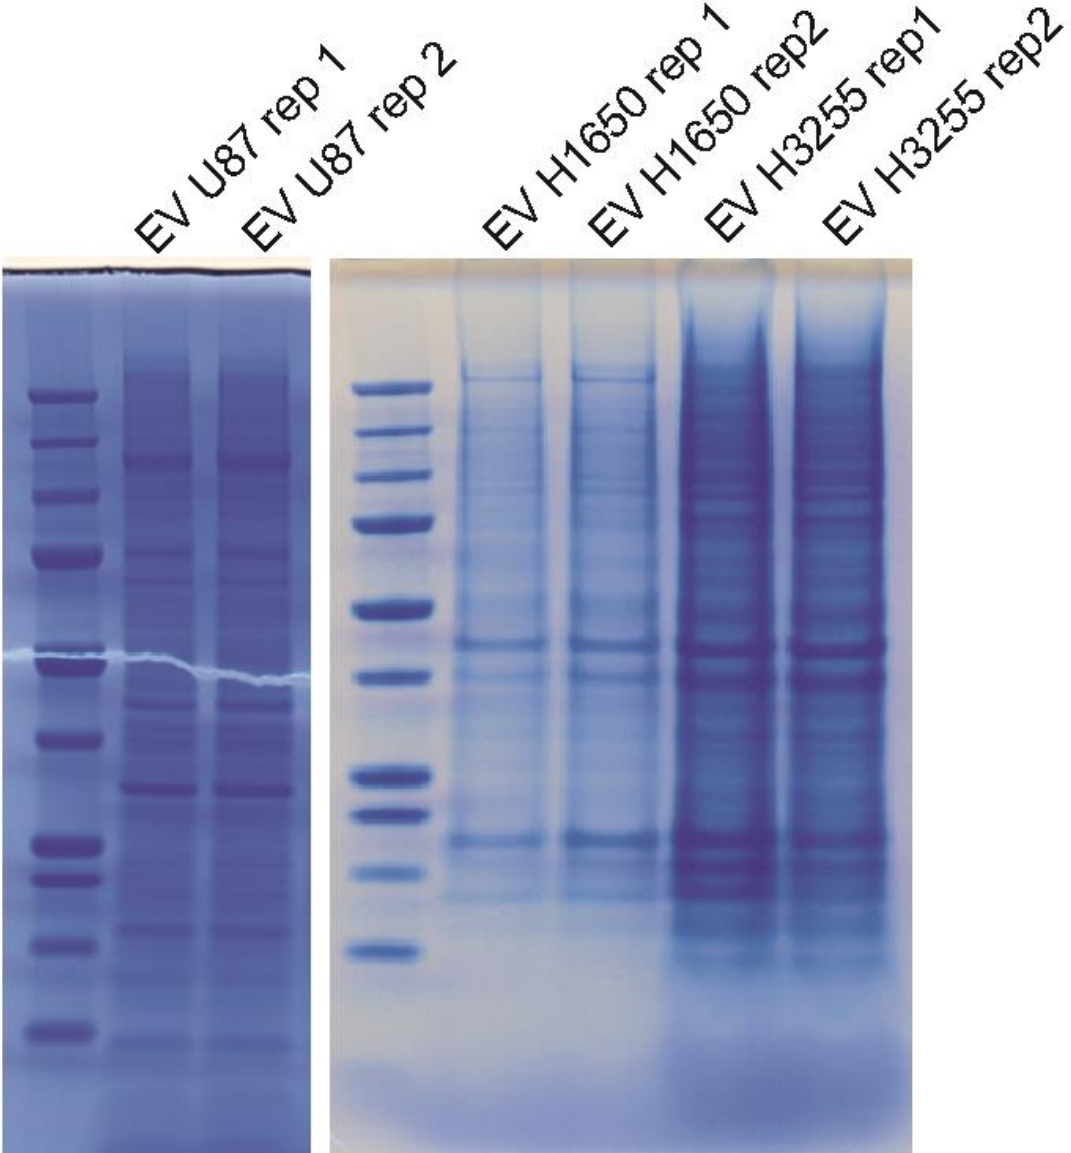



## Supplementary table 2. Clinical data of the NSCLC patients (n=12).

|                                |                | Stable disease (n=7)          |      | Progressive disease (n=5)     |     |
|--------------------------------|----------------|-------------------------------|------|-------------------------------|-----|
|                                |                | n                             | %    | n                             | %   |
| Mean age ±SD                   |                | 55                            | (11) | 64                            | (7) |
| Male                           |                | 5                             | 71   | 1                             | 20  |
| Stage IV disease               |                | 7                             | 100  | 5                             | 100 |
| Histology                      |                |                               |      |                               |     |
|                                | Adenocarcinoma | 7                             | 100  | 4                             | 80  |
|                                | Large cell     | 0                             | 0    | 1                             | 20  |
| Smoker                         |                |                               |      |                               |     |
|                                | current        | 1                             | 14   | 2                             | 40  |
|                                | former         | 6                             | 86   | 3                             | 60  |
| Performance Score              |                |                               |      |                               |     |
|                                | 0              | 5                             | 71   | 1                             | 20  |
|                                | 1              | 2                             | 29   | 4                             | 80  |
| Previous lines of chemotherapy |                |                               |      |                               |     |
|                                | 1              | 3                             | 43   | 5                             | 100 |
|                                | 2              | 4                             | 57   | 0                             | 0   |
| Median PFS                     |                | 4,1 months (95% CI., 0,6-7,5) |      | 0,8 months (95% CI., 0,7-0,8) |     |
| Median OS                      |                | 6,5 months (95% CI., 3,1-9,9) |      | 2.1 months (95% CI., 0,3-3,9) |     |
